# Supplementary material
Source: PubMed Central journal article supplement (PMC3334416)
Supplement: NIHMS365583-supplement-1.pdf [file NIHMS365583-supplement-1.pdf]

**Supplemental Information for**  
**Increased Protein Structural Resolution from Diethylpyrocarbonate-based**  
**Covalent Labeling and Mass Spectrometric Detection**

Yuping Zhou and Richard W. Vachet\*

Department of Chemistry, University of Massachusetts, Amherst

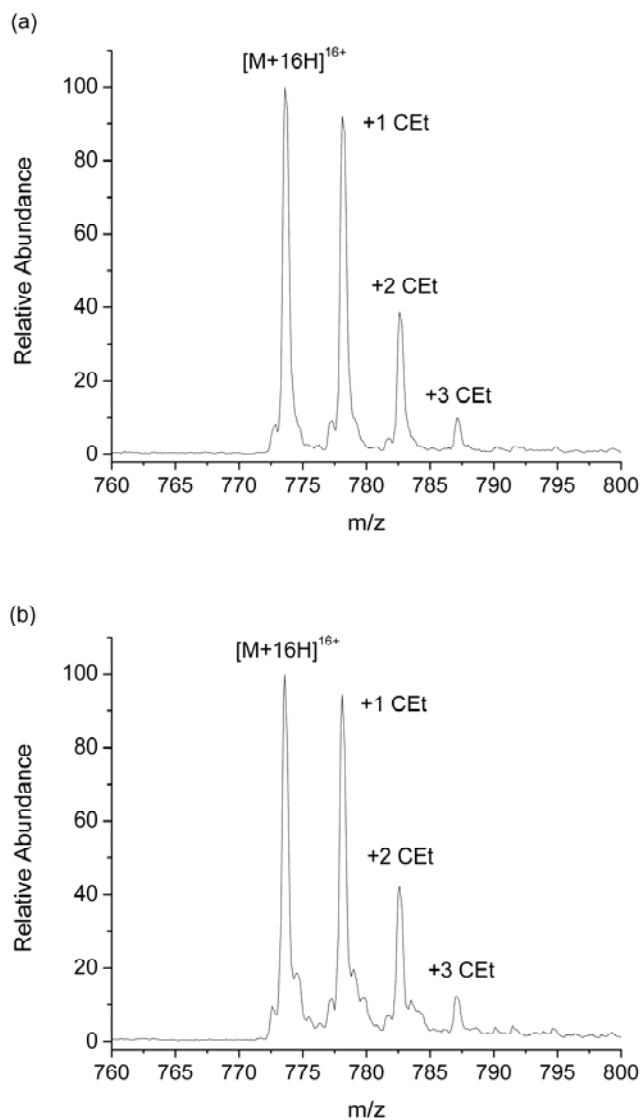

**Figure S1:** Expanded view of mass spectra showing the extent of DEPC modification for the +16 charge state of cytochrome c (a) 10 min after quenching the reaction and (b) 24 hrs after quenching the reaction. CEt refers to the carboxy group that is added to the protein upon reaction with DEPC. The modification percentage of the intact protein is determined from the sum of the ion abundances for the modified protein divided by the total ion abundances for all the peaks (modified and

unmodified) for all the charge states. In (a) the modification percentage is  $56 \pm 3\%$  based on three separate experiments. In (b) the modification percentage is  $57 \pm 2\%$  based on three separate experiments.

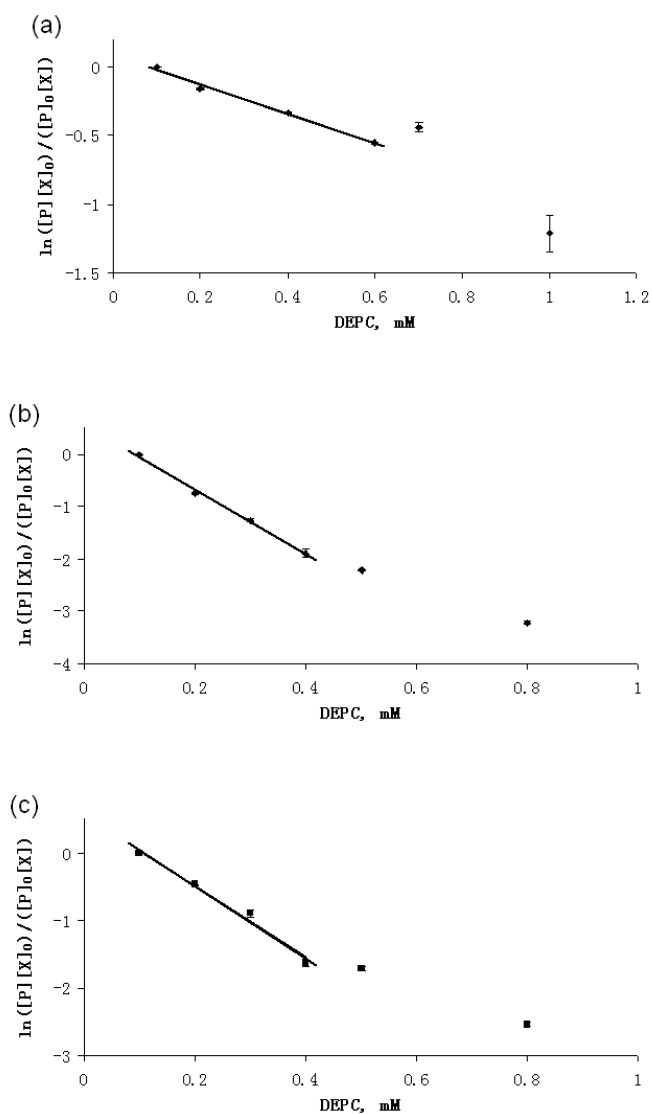

**Figure S2:** Kinetics plots for the reaction of DEPC with (a) cytochrome c, (b) myoglobin, and (c)  $\beta$ -2-microglobulin. The plot for each protein was generated from ESI-MS data of the DEPC-reacted proteins. In previous work [1], we demonstrated that deviations from linearity indicate reagent concentrations at which protein structural changes begin to occur. Based on these plots, proteins are reacted at DEPC concentrations below the linearity break point to ensure the structural integrity of the protein. On these second-order kinetics plots, the x axis is DEPC concentration, and the y axis corresponds to  $\ln([P][X]_0)/([P]_0[X])$ . The  $[P]/[P]_0$  ratio is calculated by dividing the peak area of the unmodified protein by the sum of the peak areas of the

modified and unmodified protein. The concentration of DEPC,  $[X]$  is obtained by the difference between the  $[P]$  and  $[P]_0$  values.

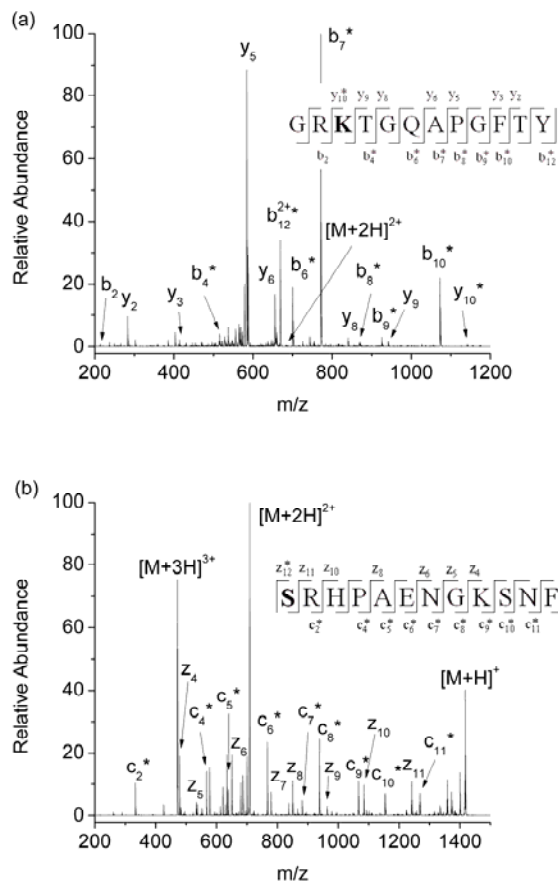

**Figure S3:** (a) Tandem mass spectrum acquired after CID of the  $[M+2H]^{2+}$  ion of the Gly37-Tyr48 proteolytic fragment from cytochrome c. A series of unmodified y ions from  $y_2$  to  $y_9$ , a series of modified b ions from  $b_4$  to  $b_{12}$ , a modified  $y_{10}$  ion, and an unmodified  $b_2$  ion confirm that Lys39 is the site of modification. (b) Tandem mass spectrum acquired after ETD of the  $[M+3H]^{3+}$  ion of the Ser11-Phe22 fragment of  $\beta 2m$ . A series of modified c ions and a series of unmodified z ions confirm that Ser11 is the site of modification. The product ions with an asterisk are the product ions that contain the DEPC modification.

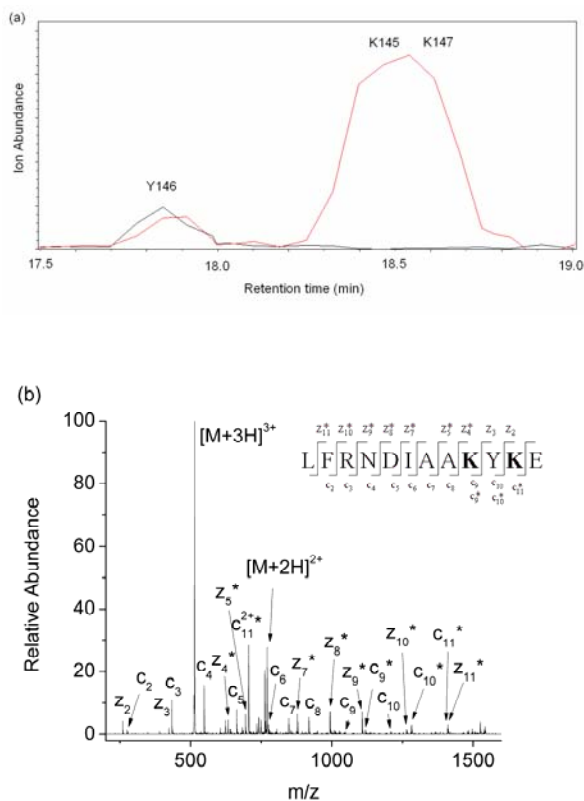

**Figure S4:** (a) Extracted ion chromatograms (EIC) of  $m/z$  514 (red) and 385.7 (black), which are the +3 and +4 charge state of the DEPC-modified peptide  $^{137}\text{LFRNDIAAKYKE}^{148}$  from myoglobin. (b) An example ETD tandem mass spectrum of the second chromatographic peak of the modified Leu137-Glu148 fragment, illustrating how ETD can identify two modified sites. A series of unmodified  $c_2$  to  $c_8$  ions, a mix of modified and unmodified  $c_9$  and  $c_{10}$  ions, and a modified  $c_{11}$  ion indicate that both K145 and K147 are modified. Note: modified  $z_2$  and  $z_3$  ions are not observed because when K147 is modified these products are no longer charged.

Table S1. Solvent accessible surface area (SASA) ratios for DEPC-modifiable amino acids in cytochrome c, myoglobin and  $\beta$ -2-microglobulin. The modification status under two different digestion conditions is indicated for cytochrome c and myoglobin.

| Cytochrome c <sup>1</sup> |                           |                 |       |
|---------------------------|---------------------------|-----------------|-------|
| residue                   | % SASA ratio <sup>2</sup> | 2 h             | Glu-C |
| His18                     | 15.2                      | -- <sup>3</sup> | --    |
| His26                     | 34.2                      | --              | --    |
| His33                     | 48.7                      | --              | --    |
| Tyr48                     | 25.9                      | --              | --    |
| Tyr76                     | 10.3                      | --              | --    |
| Tyr74                     | 27.3                      | --              | --    |
| Tyr97                     | 8.0                       | --              | --    |
| Thr19                     | 3.0                       | --              | --    |

|                        |              |         |         |
|------------------------|--------------|---------|---------|
| Thr28                  | 41.5         | --      | --      |
| Thr40                  | 0.0          | --      | --      |
| Thr47                  | 100.0        | --      | --      |
| Thr49                  | 40.9         | --      | --      |
| Thr58                  | 48.1         | --      | --      |
| Thr63                  | 12.0         | --      | --      |
| Thr78                  | 8.9          | --      | --      |
| Thr89                  | 64.9         | --      | --      |
| Thr102                 | 1.1          | --      | --      |
| N-terminus             | 53.9         | --      | --      |
| Lys5                   | 78.8         | --      | Labeled |
| Lys7                   | 69.8         | --      | Labeled |
| Lys8                   | 75.4         | --      | Labeled |
| Lys13                  | 40.8         | --      | --      |
| Lys22                  | 84.0         | --      | Labeled |
| Lys25                  | 90.7         | Labeled | Labeled |
| Lys27                  | 63.4         | --      | Labeled |
| Lys39                  | 72.9         | Labeled | Labeled |
| Lys53                  | 63.0         | Labeled | Labeled |
| Lys55                  | 36.5         | Labeled | Labeled |
| Lys60                  | 50.0         | Labeled | Labeled |
| Lys72                  | 75.3         | Labeled | Labeled |
| Lys73                  | 62.6         | Labeled | Labeled |
| Lys79                  | 68.3         | --      | Labeled |
| Lys86                  | 41.6         | Labeled | Labeled |
| Lys87                  | 86.8         | Labeled | Labeled |
| Lys88                  | 94.0         | Labeled | Labeled |
| Lys99                  | 44.2         | Labeled | Labeled |
| Lys100                 | 50.4         | Labeled | Labeled |
| Cys17 <sup>4</sup>     | 44.6         | --      | --      |
| % Labeled <sup>5</sup> |              | 45%     | 67%     |
| <b>Myoglobin</b>       |              |         |         |
| residue                | % SASA ratio | 2 h     | Glu-C   |
| His24                  | 2.7          | Labeled | --      |
| His36                  | 32.6         | Labeled | Labeled |
| His48                  | 64.7         | --      | Labeled |
| His64                  | 26.6         | --      | Labeled |
| His81                  | 89.1         | Labeled | Labeled |
| His82                  | 4.9          | --      | --      |
| His93                  | 35.3         | --      | --      |
| His97                  | 43.3         | --      | Labeled |
| His113                 | 43.2         | --      | Labeled |
| His116                 | 43.9         | Labeled | Labeled |

|                          |              |         |         |
|--------------------------|--------------|---------|---------|
| His119                   | 20.0         | --      | --      |
| Tyr103                   | 15.2         | --      | Labeled |
| Tyr146                   | 4.2          | --      | Labeled |
| Ser3                     | 63.8         | --      | --      |
| Ser58                    | 9.1          | --      | --      |
| Ser92                    | 0.0          | --      | Labeled |
| Ser108                   | 5.4          | --      | --      |
| Ser117                   | 51.3         | Labeled | Labeled |
| Thr34                    | 33.9         | --      | --      |
| Thr39                    | 1.9          | --      | --      |
| Thr51                    | 61.8         | --      | --      |
| Thr66                    | 40.2         | --      | --      |
| Thr70                    | 71.8         | --      | --      |
| Thr95                    | 76.2         | --      | Labeled |
| Thr132                   | 45.8         | --      | --      |
| N-terminus               | 97.8         | Labeled | Labeled |
| Lys16                    | 22.1         | Labeled | --      |
| Lys42                    | 33.0         | Labeled | Labeled |
| Lys45                    | 54.9         | Labeled | Labeled |
| Lys47                    | 0.0          | --      | --      |
| Lys50                    | 83.4         | --      | Labeled |
| Lys56                    | 58.3         | --      | --      |
| Lys62                    | 48.0         | --      | Labeled |
| Lys63                    | 75.3         | --      | Labeled |
| Lys77                    | 50.5         | Labeled | Labeled |
| Lys78                    | 46.2         | Labeled | Labeled |
| Lys79                    | 53.6         | Labeled | Labeled |
| Lys87                    | 52.0         | --      | Labeled |
| Lys96                    | 84.2         | --      | Labeled |
| Lys98                    | 65.0         | --      | Labeled |
| Lys102                   | 63.6         | --      | --      |
| Lys118                   | 23.5         | --      | Labeled |
| Lys133                   | 44.8         | --      | --      |
| Lys145                   | 16.4         | --      | Labeled |
| Lys147                   | 97.0         | --      | Labeled |
| % Labeled <sup>5</sup>   |              | 39%     | 81%     |
| <b>β-2-microglobulin</b> |              |         |         |
| residue                  | % SASA ratio | 2 h     |         |
| His13                    | 50.8         | Labeled |         |
| His31                    | 32.7         | Labeled |         |
| His51                    | 54.7         | Labeled |         |
| His84                    | 0.0          | --      |         |
| Tyr10                    | 41.9         | Labeled |         |

|                        |           |         |  |
|------------------------|-----------|---------|--|
| Tyr26                  | 25.8      | --      |  |
| Tyr63                  | 27.1      | --      |  |
| Tyr66                  | 7.0       | --      |  |
| Tyr67/Thr68            | 22.5/2.5  | Labeled |  |
| Tyr78                  | 6.0       | Labeled |  |
| Ser11                  | 11.4      | Labeled |  |
| Ser20                  | 65.0      | Labeled |  |
| Ser28                  | 19.7      | Labeled |  |
| Ser33                  | 66.4      | Labeled |  |
| Ser52                  | 43.8      | --      |  |
| Ser55                  | 55.9      | Labeled |  |
| Ser57/Lys58            | 35.2/96.3 | Labeled |  |
| Ser61                  | 27.1      | --      |  |
| Ser88                  | 90.1      | --      |  |
| Thr4                   | 83.8      | --      |  |
| Thr71                  | 36.0      | --      |  |
| Thr73                  | 61.4      | --      |  |
| Thr86                  | 17.8      | --      |  |
| N-terminus             | 85.0      | Labeled |  |
| Lys6                   | 80.1      | Labeled |  |
| Lys19                  | 69.0      | Labeled |  |
| Lys41                  | 14.1      | Labeled |  |
| Lys48                  | 81.8      | Labeled |  |
| Lys75                  | 92.3      | Labeled |  |
| Lys91                  | 61.5      | Labeled |  |
| Lys94                  | 67.8      | Labeled |  |
| Cys25                  | 0.0       | --      |  |
| Cys80                  | 0.0       | --      |  |
| % Labeled <sup>5</sup> |           | 95%     |  |

1. The PDB IDs for cytochrome c, myoglobin and  $\beta$ -2-microglobulin that were used to determine SASA were 1AKK, 1DWR and 1JNJ, respectively. For  $\beta$ -2-microglobulin, 1JNJ consists of 20 NMR structures, and so the reported SASA values are the average from these 20 structures.
2. SASA was calculated using GETAREA 1.1 [2]. 1.4 Å was used as the probe radius, and the calculated SASA percentage is the ratio of the SASA of the side chain in the protein to the SASA of the side chain (X) in the unstructured Gly-X-Gly tripeptide. Residues with %SASA values that exceed 50% are typically considered to be solvent exposed, and residues with ratios less than 20% are typically considered to be buried. We chose 30% as the cutoff for determining if a residue is solvent exposed.
3. -- indicates that modified peptide is not detected.
4. GETAREA ignores the heme in cytochrome c, so it calculates Cys17 to be solvent exposed when it is really not because it is covalently bound to the heme.

5. % labeled corresponds to the percentage of the surface exposed modifiable (i.e. His, Lys, Cys, Ser, Thr, and Tyr) residues that are found to be labeled.

#### Reference

1. Mendoza, V. L., Vachet, R. W.: Protein Surface Mapping Using Diethylpyrocarbonate with Mass Spectrometric Detection. *Anal. Chem.* **80**, 2895-2904 (2008)
2. Fraczekiewicz, R., Braun, W.: Exact and efficient analytical calculation of the accessible surface areas and their gradients for macromolecules. *J. Comput. Chem.* **19**, 319-333 (1998)
